# Supplementary material for: Concurrent epigenetic silencing of wnt/β-catenin pathway inhibitor genes in B cell chronic lymphocytic leukaemia
Source: PubMed Central journal article supplement (PMC3489542; doi:10.1186/1471-2407-12-213), 2012-06-06
Supplement: 1471-2407-12-213-S1.pdf [file 1471-2407-12-213-S1.pdf]

## Additional file 1

Demographic and clinical characteristics of CLL patients and healthy donors

| Status                    | Sample ID             | Age | Sex | Country of origin | Staging |       | Leukocytosis, $\times 10^9/L$ | Lymphocyte gate, % | CD19 <sup>+</sup> in lymphocyte gate, % | CD19 <sup>+</sup> /CD5 <sup>+</sup> , % of total CD19 <sup>+</sup> | T cells in lymphocyte gate, % |
|---------------------------|-----------------------|-----|-----|-------------------|---------|-------|-------------------------------|--------------------|-----------------------------------------|--------------------------------------------------------------------|-------------------------------|
|                           |                       |     |     |                   | Rai     | Binet |                               |                    |                                         |                                                                    |                               |
| CLL                       | CLL1                  | 74  | M   | Russia            | 2       | B     | 350.0                         | 75.0               | 88.0                                    | 96.7                                                               | 8.1                           |
|                           | CLL2                  | 58  | F   | Russia            | 0       | A     | 22.9                          | 46.7               | 77.0                                    | 92.8                                                               | 20.5                          |
|                           | CLL3                  | 83  | F   | Russia            | 4       | C     | 138.0                         | 66.0               | 79.0                                    | 68.0                                                               | 15.8                          |
|                           | CLL4                  | 64  | M   | Russia            | 4       | C     | 62.4                          | 68.6               | 95.0                                    | 83.7                                                               | 6.8                           |
|                           | CLL5                  | 55  | F   | Russia            | 0       | A     | 13.4                          | 21.0               | 45.0                                    | 57.7                                                               | 53.8                          |
|                           | CLL6                  | 67  | F   | Russia            | 0       | A     | 11.3                          | 83.0               | 77.0                                    | 92.0                                                               | 20.9                          |
|                           | CLL7                  | 66  | F   | Russia            | 0       | A     | 20.6                          | 92.0               | 75.0                                    | 84.4                                                               | 26.3                          |
|                           | CLL8                  | 67  | F   | Russia            | 0       | A     | 17.8                          | 14.0               | 16.0                                    | 15.0                                                               | 73.5                          |
|                           | CLL9                  | 68  | M   | Russia            | 4       | C     | 12.6                          | 78.0               | 97.0                                    | 92.0                                                               | 4.9                           |
|                           | CLL10                 | 42  | F   | Russia            | 1       | A     | 25.2                          | 68.0               | 98.0                                    | 89.0                                                               | 0.9                           |
|                           | CLL11                 | 51  | F   | Russia            | 0       | A     | 12.7                          | 94.0               | 98.0                                    | 93.0                                                               | 0.8                           |
|                           | CLL12                 | 62  | F   | Russia            | 2       | A     | 140.0                         | 96.0               | 86.0                                    | 85.0                                                               | 12.7                          |
| CD19 <sup>+</sup> control | CD19 <sup>+</sup> (1) | 29  | M   | Russia            | -       | -     | -                             | -                  | -                                       | -                                                                  | -                             |
|                           | CD19 <sup>+</sup> (2) | 50  | F   | Germany           | -       | -     | -                             | -                  | -                                       | -                                                                  | -                             |
|                           | CD19 <sup>+</sup> (3) | 41  | F   | Germany           | -       | -     | -                             | -                  | -                                       | -                                                                  | -                             |
|                           | CD19 <sup>+</sup> (4) | 24  | M   | Germany           | -       | -     | -                             | -                  | -                                       | -                                                                  | -                             |
|                           | CD19 <sup>+</sup> (5) | 19  | F   | Germany           | -       | -     | -                             | -                  | -                                       | -                                                                  | -                             |
